# Supplementary material
Source: PubMed Central journal article supplement (PMC6125502)

1 **Supplemental data**

2 **Table S1. Comparison of clinical data for sources of BLNAS, Low/High-BLNAR, BLPAR, and BLPACR isolates.**

| Genotype | Group    | Number of isolates | Sex |    | Age (years) |       |     | Specimens |                  |             |                 |          |             |        |      |       |   |
|----------|----------|--------------------|-----|----|-------------|-------|-----|-----------|------------------|-------------|-----------------|----------|-------------|--------|------|-------|---|
|          |          |                    | M   | F  | ≤15         | 16–64 | ≥65 | Sputum    | Pharyngeal mucus | Nasal mucus | Nasal discharge | Otorrhea | Oral cavity | Tonsil | BALF | Other |   |
| BLNAS    | -        | 35                 | 25  | 10 | 3           | 14    | 18  | 18        | 6                | 4           | 3               | 1        |             | 1      |      | 2     |   |
| BLNAR    | II       | 5                  | 2   | 3  |             | 2     | 3   | 4         |                  |             | 1               |          |             |        |      |       |   |
|          | III      | 47                 | 31  | 16 | 11          | 18    | 18  | 23        | 7                | 5           | 3               | 2        |             | 2      | 2    | 3     |   |
|          | III-like | 9                  | 7   | 2  | 2           | 3     | 4   | 6         | 2                |             |                 | 1        |             |        |      |       |   |
|          | IV*      | 1                  |     | 1  |             | 1     |     | 1         |                  |             |                 |          |             |        |      |       |   |
| BLPAR    | -        | 5                  | 5   |    |             |       | 5   | 2         | 1                |             |                 |          |             |        |      | 2     |   |
| BLPACRII | III      | 2                  |     | 2  |             | 1     | 1   | 1         |                  |             |                 |          |             |        |      |       | 1 |

3 \*, SMHi90. BALF, bronchoalveolar lavage fluid

4

5

6 **Figure S1. Comparison of amino acid substitution of PBP3 and nucleotide**  
7 **sequence of *ftsI* in *H. influenzae* SMHi90 and representative isolates within group**  
8 **III and III-like.**

9 (A) Amino acid changes (Asp350 to Asn611) and (B) nucleotide changes (nucleotide  
10 position from 1549 to 1833) of *ftsI* of SMHi90 compared with Rd, group III (SMHi2),  
11 and group III-like (SMHi107). SMHi2 and SMHi107 belong to the most common  
12 PBP3 amino acid substitution type in group III and group III-like, respectively. <sup>a</sup> and <sup>b</sup>  
13 correspond to amino acids at positions 517 and 526, respectively. The nucleotide  
14 sequence of *ftsI* of SMHi90 was registered in DNA Data Bank of Japan (DDBJ) as  
15 accession number LC379877.

16

17 **Figure S2. Phylogenetic tree of *ftsI* sequence of *H. influenzae* isolates.**

18 Neighbor-Joining dendrogram of the BLNAS (n=11), Low-BLNAR (n=5),  
19 High-BLNAR (n=57), BLPAR (n=5), and BLPACR isolates (n=2) investigated in this  
20 study.

21



FIG S2

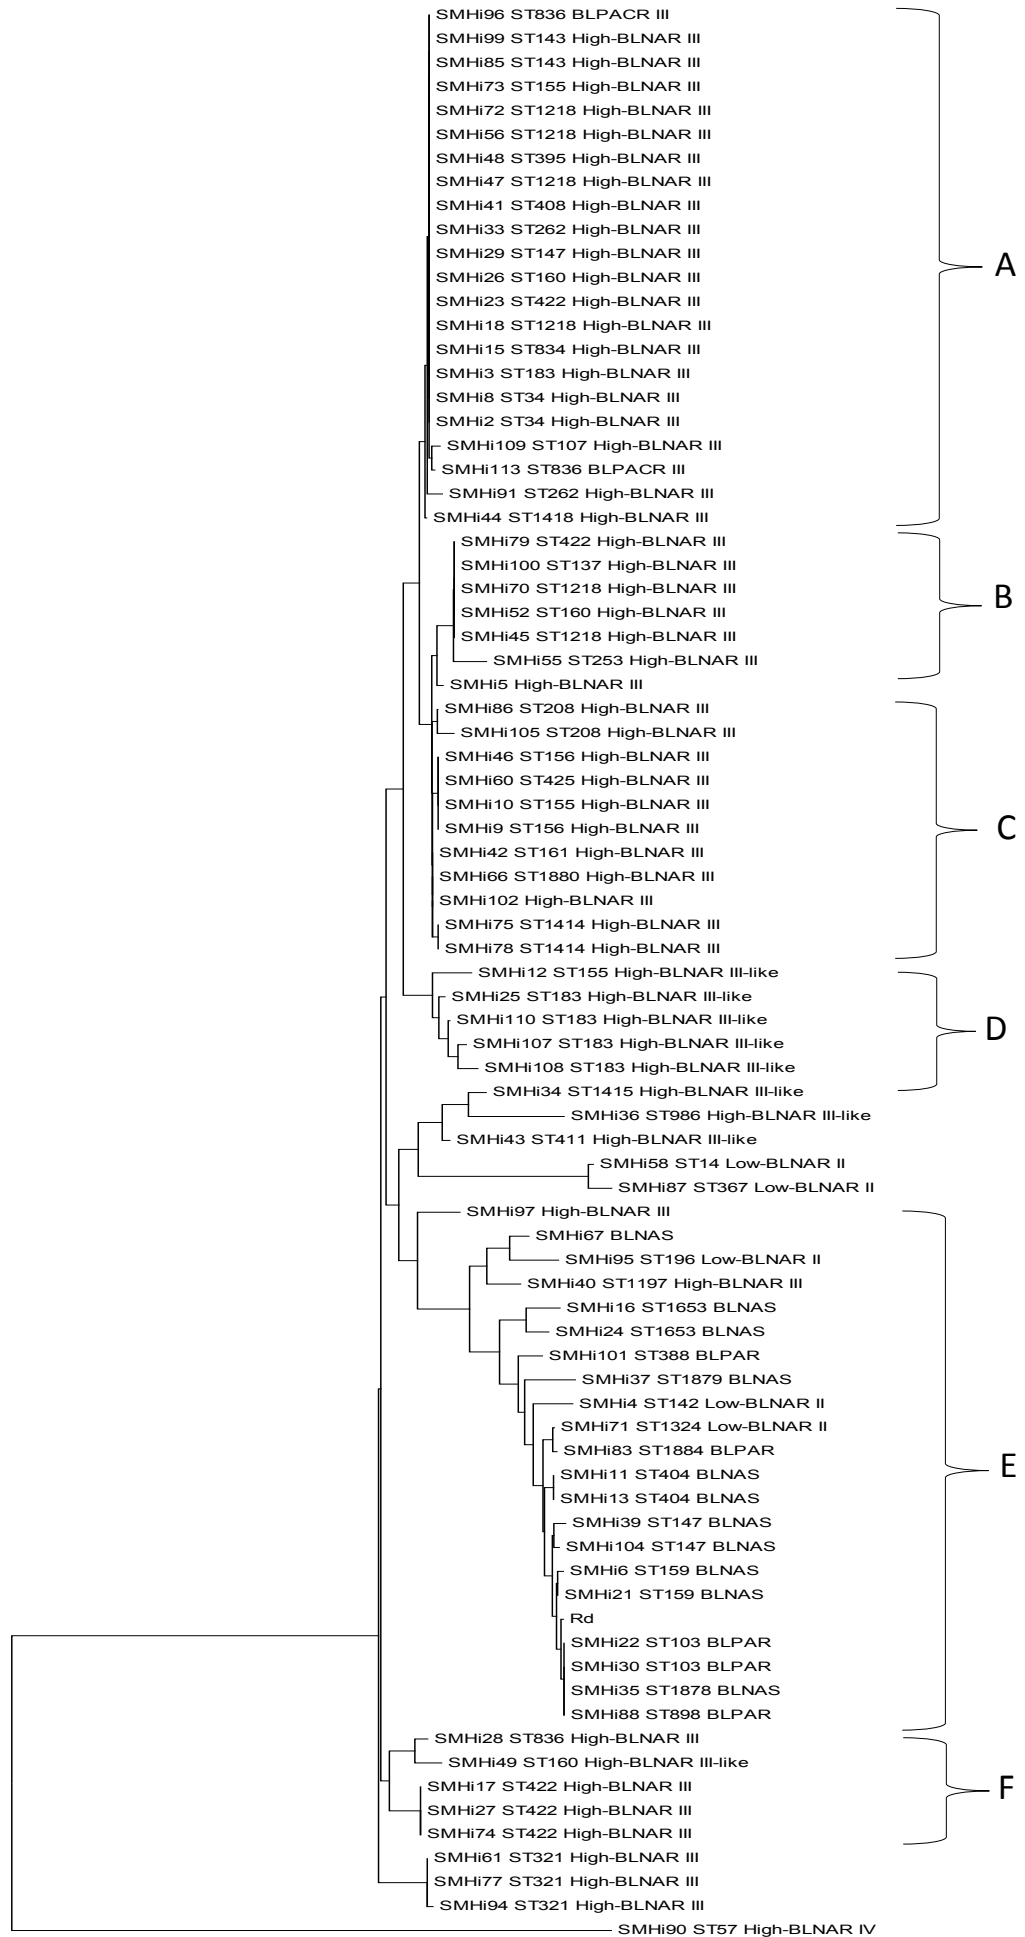

Supplement: zac009187450s1.pdf [file zac009187450s1.pdf]
